# Supplementary material for: Chain-end functionalization of living helical polyisocyanides through a Pd(ii)-mediated Sonogashira coupling reaction
Source: Royal Society of Chemistry journal article supplement (doi:10.1039/d1py00809a), 2021-01-01
Supplement: d1py00809a1.pdf [file d1py00809a1.pdf]

## Supporting Information

# **Chain-End Functionalization of Living Helical Polyisocyanides Through Pd(II)-Mediated Sonogashira Coupling Reaction**

Xun-Hui Xu, Wen-Bin Liu, Xue Song, Li Zhou, Na Liu, Yuan-Yuan Zhu and Zong-Quan Wu\*

Department of Polymer Science and Engineering, School of Chemistry and Chemical Engineering, and Anhui Key Laboratory of Advanced Catalytic Materials and Reaction Engineering, Hefei University of Technology, Hefei 230009, Anhui Province, China.

---

## Table of Contents

|                                                                                                                                                                       |         |
|-----------------------------------------------------------------------------------------------------------------------------------------------------------------------|---------|
| <b>General considerations</b> .....                                                                                                                                   | S3      |
| <b>Synthetic procedure</b> .....                                                                                                                                      | S4      |
| <b>Synthesis of alkyne-<math>R_{2a}</math>, poly-<math>3a_{45}</math>, poly-<math>3b_{400}</math>, poly-<math>3c_{400}</math> and poly-<math>3d_{75}</math></b> ..... | S4-S13  |
| <b>Figure S1.</b> $^1H$ NMR spectrum of poly- $1a_{150}$ .....                                                                                                        | S14     |
| <b>Figure S2.</b> $^1H$ NMR spectrum of poly- $1b_{150}$ .....                                                                                                        | S14     |
| <b>Figure S3-S4.</b> SEC curves and FT-IR spectra of poly- $1a_{20}$ and poly- $1a_{20}(L_n)-R_{2a}$ .....                                                            | S14     |
| <b>Figure S5-S7.</b> SEC curves, $^{19}F$ NMR spectra and of FT-IR spectra poly- $1a_{20}$ and poly- $1a_{20}(L_1)-R_{2b}$ .....                                      | S15     |
| <b>Figure S8-S9.</b> SEC curves of and FT-IR spectra of poly- $1a_{20}$ and poly- $1a_{20}(L_1)-R_{2c}$ .....                                                         | S16     |
| <b>Figure S10.</b> FT-IR spectra of poly- $1a_{150}$ , poly- $3a_{45}$ and poly( $1a_{150}-b-3a_{45}$ ) .....                                                         | S16     |
| <b>Figure S11-S19.</b> SEC, $^1H$ NMR, FT-IR spectra of homopolymers and block copolymers .....                                                                       | S17-S21 |
| <b>Figure S20.</b> UV-vis absorption spectra of homopolymers and block copolymers .....                                                                               | S21     |
| <b>Figure S21.</b> DSC and TGA curves of the homopolymers and block copolymers .....                                                                                  | S22     |
| <b>Figure S22.</b> SEC curves of $M$ -poly- $1b_{150}$ , $M$ -poly( $1b_{150}-b-3c_{60}$ ), poly- $1b_{150}$ and poly( $1b_{150}-b-3c_{60}$ ) .....                   | S22     |
| <b>Figure S23-S24.</b> $^1H$ NMR and FT-IR spectra of $M$ -poly- $1b_{150}$ , poly- $3c_{60}$ , and $M$ -poly( $1a_{150}-b-3c_{60}$ ) .....                           | S23     |
| <b>Figure S25.</b> CD curves of $M$ -poly- $1b_{150}$ , $M$ -poly( $1b_{150}-b-3c_{60}$ ), poly- $1b_{150}$ and poly( $1b_{150}-b-3c_{60}$ ) .....                    | S24     |
| <b>Figure S26.</b> DSC and TGA curves of poly- $1b_{150}$ , poly- $3c_{60}$ , and poly( $1b_{150}-b-3c_{60}$ ) .....                                                  | S24     |
| <b>Figure S27.</b> AFM height images of poly( $1a_{150}-b-3a_{45}$ ) .....                                                                                            | S24     |
| <b>Figure S28.</b> SEC curves of poly- $1a_{150+150}$ is synthesized by one-pot method .....                                                                          | S25     |
| <b>Figure S29.</b> $^1H$ NMR spectrum of poly- $1b_{20}-(TPY)$ .....                                                                                                  | S25     |
| <b>Figure S30.</b> AFM phase image and of fluorescence spectra $M$ -poly- $1b_{150+150}$ .....                                                                        | S25     |
| <b>Figure S31, S32.</b> $^1H$ NMR spectra of monomer $1a$ and monomer $1b$ .....                                                                                      | S26     |
| <b>Figure S33, S34.</b> $^1H$ NMR spectra of Pd(II) initiator and $L_1^s$ ligand .....                                                                                | S27     |
| <b>Figure S35, S36.</b> $^1H$ NMR spectra of alkynyl- $R_{2a}$ and alkynyl-ATRP initiator .....                                                                       | S28     |
| <b>Figure S37, S38.</b> $^1H$ NMR spectra of product $4$ and alkynyl-TPY .....                                                                                        | S29     |
| <b>References</b> .....                                                                                                                                               | S30     |

---

## Experimental Procedures

**General considerations.** The nuclear magnetic resonance (NMR) spectra were recorded using a Bruker 600 MHz  $\{^1\text{H}\}$  spectrometer operated in the Fourier Transform mode. Chemical shifts are reported in delta ( $\delta$ ) units and expressed in parts per million (ppm) downfield from tetramethylsilane using the residual proton solvent as an internal standard. Size exclusion chromatography (SEC) was performed on Waters 1515 pump and Waters 2414 differential refractive index (RI) detector. The eluent was tetrahydrofuran (THF) containing 0.1 wt% tetra-*n*-butylammonium bromide (TBAB) as the eluent at a flow rate of 0.8 mL/min. A series of two linear TSK gel GMHHR-H columns were used.  $M_n$  and  $M_w/M_n$  values were reported with reference to the polystyrene standards. FT-IR spectra were recorded on Perkin-Elmer Spectrum BX FT-IR system using KBr pellets at 25 °C. Circular dichroism (CD) spectra were performed on JASCO J1500 using 10.0 mm quartz cells. Absorption spectra were recorded on UNIC 4802 UV/vis double beam spectrophotometer in a 1.0 cm quartz cell at 25 °C. The optical rotations were measured in  $\text{CHCl}_3$  at room temperature using a 10.0 cm quartz cell on a WZZ-2S polarimeter. Atomic force microscope (AFM) was performed on a Cypher S microscope (Oxford Instruments, Asylum Research). Differential scanning calorimetric (DSC) measurements were carried on a Mettler-Toledo DSC821e instrument. Samples were first heated from 0 °C to 140 °C at a heating rate of 10 °C/min under nitrogen atmosphere. Thermogravimetric analysis (TGA) was performed under a nitrogen atmosphere at a heating rate of 10 °C/min from 30 °C to 800 °C using a Netzsch TG 209 F3 instrument. All solvents and chemicals were purchased from Sinopharm, and Aladdin Co. Ltd., and were purified by the standard procedures before used. Tetrahydrofuran (THF) for polymerizations was further dried over sodium benzophenone ketyl, distilled onto lithium aluminum hydride under nitrogen, and distilled under high vacuum just before use. Monomer **1a**, **1b**, Pd(II)-catalyst and Wei-Phos (**L1**) were prepared according to the literatures and the structures were confirmed by  $^1\text{H}$  NMR.<sup>1-3</sup>

AFM Measurements.<sup>4</sup> Both topographic and phase images of assemblies of different nanostructures were obtained in Tapping Mode using rectangular silicon cantilever with a spring constant of 26 N m<sup>-1</sup>, a

resonance frequency lying in the 62-120 kHz range and a radius of curvature of less than 10 nm. Samples were prepared by solvent casting at ambient temperature from 0.2 mg/mL with mixed solvents in different proportions. A drop (20  $\mu$ L) of suspension was deposited onto clean silicon wafer and after 2 minutes the excess of solution was removed with blotting paper. Subsequently, the substrate was dried under nitrogen flow during several minutes. Measurements of length and width were taken using the section Particle Analysis tool provided with the AFM software (Asylum Research).

Stock solutions of *M*-poly-**1b**<sub>150</sub> and *M*-poly-**1b**<sub>150+150</sub> in dry THF (0.02 mg/mL) were prepared. Samples for AFM measurements were prepared by casting 20  $\mu$ L aliquots of the stock solutions of the S6 polymers on freshly cleaved highly oriented pyrolytic graphite (HOPG) substrate. The samples on HOPG were annealed under THF vapor atmospheres at room temperature for 12 h, and then dried under vacuum for 2 h. The organic solvent vapor was prepared by putting 1 mL of THF into a 2 mL flask that was inside a 50 mL flask, and the HOPG substrates were then placed in the 50 mL flask.

Emission analyses:<sup>5</sup> These experiments were carried out followed the reported literatures with modifications. Taking the photoluminescence (PL) spectrum in solution states for the poly-**1a**<sub>20</sub>(**L**<sub>n</sub>)-**R**<sub>2a</sub> as an example. Put the polymer poly-**1a**<sub>20</sub>(**L**<sub>n</sub>)-**R**<sub>2a</sub> solution (*c* = 0.005 mg/mL) into a fluorescent cuvette (optical path length = 1.0 cm) with a volume of about 3 mL at 25 °C, and the cuvette was installed into Hitachi F-4600 fluorescence. The fluorescence spectrum of the solution was monitored at 25 °C in the range of emission wavelength between 400 and 650 nm, excited by UV light at 369 nm.

### Synthesis of alkynyl-**R**<sub>2a</sub>, poly-**3a**<sub>45</sub>, poly-**3b**<sub>400</sub>, poly-**3c**<sub>400</sub> and poly-**3d**<sub>75</sub>.

#### Scheme S1. Synthesis of alkynyl-**R**<sub>2a</sub>

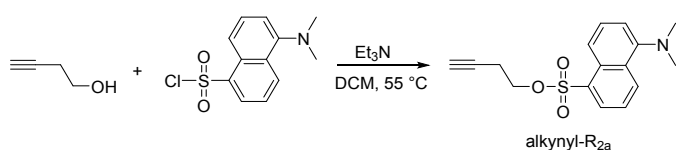

Alkynyl-R<sub>2a</sub> was synthesized according the literature with slight modification.<sup>6</sup> Butynol (31.0 mg, 0.44 mmol) and dansyl chloride (100 mg, 0.37 mmol) were added in a dried 10 mL oven-dried flask. Et<sub>3</sub>N (2.0 mL) was added under a nitrogen atmosphere and 5.0 mL of THF was added to dissolve the raw materials. Then the reaction flask was heated to 60 °C for overnight. After the dansyl chloride was consumed completely, the solvent was removed in vacuo. The residue was purified by silica gel chromatography using petroleum ether/EtOAc (v/v = 8: 1) as eluent to afford the desired product as yellow oil (100.8 mg, 90% yield). <sup>1</sup>H NMR (600 MHz, CDCl<sub>3</sub>, 25 °C): δ 8.52–8.51 (d, *J* = 6 Hz, H, aromatic), 8.26–8.25 (d, *J* = 6 Hz, H, aromatic), 8.19–8.18 (d, *J* = 6 Hz, H, aromatic), 7.59–7.56 (t, H, aromatic), 7.46– 7.44 (t, H, aromatic), 7.18–7.17 (d, *J* = 6 Hz, H, aromatic), 4.07 (t, 2H, CH<sub>2</sub>), 2.86 (t, 6H, N(CH<sub>3</sub>)<sub>2</sub>), 2.52 (t, 2H, CH<sub>2</sub>), 1.82 (t, H, alkyne).

**Typical polymerization procedure of polyisocyanide.**<sup>1</sup> All polyisocyanide polymerizations were carried out in a Schlenk tube equipped with a three-way stopcock under nitrogen atmosphere. Taking the polymerization of poly-**1a**<sub>150</sub> as an example. A 10 mL oven-dried flask was then evacuated on a vacuum line and flushed with dry nitrogen. After the evacuation-flush procedure had been repeated three times, a solution of the Pd(II) initiator (0.013 M in dry THF, 89 μL), a solution of the monomer **1a** (50.0 mg in 0.67 mL dry THF) was added via a syringe at room temperature. The concentrations of monomer **1a** and the Pd(II) initiator were 0.20 and 0.0013 M, respectively ( $[\mathbf{1a}]_0/[\text{Pd}]_0 = 150$ ). The reaction flask was then immersed into a pre-heated oil bath at 55 °C and stirred for 12 h. After cooling to room temperature, the polymerization solution was precipitated into a large amount of methanol, the precipitated solid was isolated via centrifugation and dried under vacuum to afford poly-**1a**<sub>150</sub> as a yellow solid (45.1 mg, 91% yield). SEC (with reference to polystyrene standards):  $M_n = 14.8$  kDa,  $M_w/M_n = 1.21$ . <sup>1</sup>H NMR (600 MHz, CDCl<sub>3</sub>, 25 °C): δ 8.60–7.64 (brs, H, NH), 7.22–5.40 (brs, 4H, ArH), 4.86–3.64 (brs, 2H, CO<sub>2</sub>CH<sub>2</sub>), 1.86–1.20 (brs, 22H, CH<sub>2</sub> and CH<sub>3</sub>), 0.83 (br, 3H, CH<sub>3</sub>). <sup>31</sup>P NMR (121.5 MHz, CDCl<sub>3</sub>, 25 °C): δ (ppm) 13.56. FT-IR (KBr, cm<sup>-1</sup>): 2960 ( $\nu_{\text{C-H}}$ ), 2930 ( $\nu_{\text{C-H}}$ ), 2854 ( $\nu_{\text{C-H}}$ ), 1743 ( $\nu_{\text{C=O}}$ ), 1635 ( $\nu_{\text{C=O}}$ ), 1602 ( $\nu_{\text{C=N}}$ ).

## Scheme S2. Synthesis of poly-**3a**<sub>45</sub>

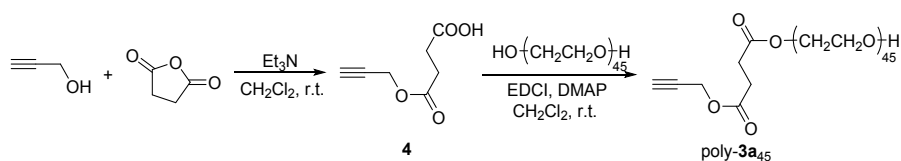

Poly-**3a**<sub>45</sub> was synthesized according to the literature with slight modification.<sup>7</sup> A mixture of succinic anhydride (6.2 g, 62 mmol, 1.2 eq), propargyl alcohol (3.0 mL, 51 mmol, 1.0 eq) and triethylamine (8.1 mL, 56 mmol, 1.1 eq) were stirred overnight in anhydrous CH<sub>2</sub>Cl<sub>2</sub> (100 mL). The reaction solution was stirred at room temperature until the propargyl alcohol was completely consumed. The reaction mixture was quenched with 2 M HCl (50 mL). The aqueous layer was separated and extracted with CH<sub>2</sub>Cl<sub>2</sub> (30 mL × 3). The organic phases were combined and washed with DI water (50 mL × 3) and brine (50 mL × 3) before drying with MgSO<sub>4</sub> and concentrated with reduced pressure. The crude was purified by silica gel chromatography with EtOAc and hexane (v/v = 1: 1) to yield the product 4-oxo-4-(prop-2-yn-1-yloxy)butanoic acid (**4**)(6.0 g, 75 % yield).

4-Dimethylaminopyridine (DMAP) (25.4 mg, 0.2 mmol, 0.8 eq) and 1-ethyl-3-(3-dimethylaminopropyl)carbodiimide hydrochloride (EDCI) (60.1 mg, 0.3 mmol, 1.2 mmol) were added to a solution of **4** (54.6 mg, 0.35 mmol, 1.4 eq) in dry CH<sub>2</sub>Cl<sub>2</sub> (150 mL). After the reaction mixture was stirred at 0 °C for 30 min under an atmosphere of argon, hydroxyl-PEG<sub>2000</sub> (5.00 g, 0.25 mmol, 1 eq) was added to the mixture. The dispersion was stirred at room temperature for 12 h. After the reaction was completed, the residual solvent was removed by evaporation. After washing by ether, the product was recrystallized from frozen isopropanol as white crystals (3.61 g, 70% yield). SEC (with reference to polystyrene standards):  $M_n = 2.0$  kDa,  $M_w/M_n = 1.05$ . <sup>1</sup>H NMR (600 MHz, CDCl<sub>3</sub>, 25 °C): δ 3.63 (m, CH<sub>2</sub>CH<sub>2</sub>O), 3.12 (s, 2H, CH<sub>2</sub>). 2.67(t, H, alkyne). FT-IR (KBr, cm<sup>-1</sup>): 2878 (ν<sub>CH2</sub>-), 1062 (ν<sub>C-O-C</sub>-).

### Scheme S3. Synthesis of poly-**3b**<sub>400</sub>

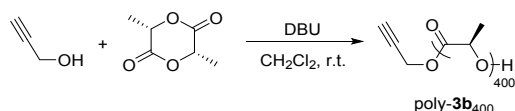

Poly-**3b**<sub>400</sub> was synthesized according to the literature with slight modification.<sup>8</sup> A 10 mL oven-dried flask was charged with monomer **3b** (1.26 g, 8.8 mmol, 250 eq), propargyl alcohol (2.0 mg, 0.035 mmol, 1.0 eq), anhydrous CH<sub>2</sub>Cl<sub>2</sub> (2.0 mL) and a stir bar. A solution of 1,8-diazabicycloundec-7-ene (DBU) in CH<sub>2</sub>Cl<sub>2</sub> (0.035 M, 1.0 mL) was added via a microsyringe to this stirring solution at ambient temperature. ([**3b**]<sub>0</sub>/[OH]<sub>0</sub> = 200). After stirring at room temperature for 12 h, the polymerization solution was precipitated into a large amount of methanol, the precipitated solid was isolated via centrifugation and dried under vacuum to afford poly-**3b**<sub>400</sub> as white solid (1.1 g, 87% yield). SEC (with reference to polystyrene standards):  $M_n = 13.3$  kDa,  $M_w/M_n = 1.20$ . <sup>1</sup>H NMR (600 MHz, CDCl<sub>3</sub>, 25 °C):  $\delta$  5.16 (m, CH), 1.58 (m, CH<sub>3</sub>). FT-IR (KBr, cm<sup>-1</sup>): 2991 ( $\nu_{C-H}$ ), 2940 ( $\nu_{C-H}$ ), 2877 ( $\nu_{C-H}$ ), 1760 ( $\nu_{C=O}$ ).

### Scheme S4. Synthesis of poly-**3c**<sub>60</sub>

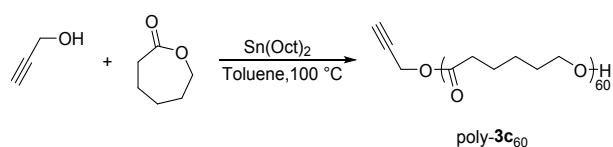

Poly-**3c**<sub>60</sub> was synthesized according to the literature with slight modification.<sup>9</sup> A 10 mL oven-dried flask was charged with monomer **4** (689.5 mg, 5.39 mmol, 70 eq), propargyl alcohol (4.3 mg, 0.077 mmol, 1 eq), anhydrous toluene (2.0 mL) and a stir bar. To this stirring solution was added a solution of Sn(Oct)<sub>2</sub> in toluene (0.035 M, 2.2 mL) via a microsyringe at ambient temperature, respectively ([**3c**]<sub>0</sub>/[OH]<sub>0</sub> = 60). After stirred at 100 °C for 12 h, the polymerization solution was precipitated into a large amount of methanol, collected by centrifugation, and dried in vacuum at room temperature overnight (517.4 mg, 75% yield). SEC:  $M_n = 7.2$  kDa,  $M_w/M_n = 1.20$ . <sup>1</sup>H NMR (600 MHz, CDCl<sub>3</sub>, 25 °C):  $\delta$  4.05 (t, 2H, -CH<sub>2</sub>O-

), 2.30 (t, 2H, CH<sub>2</sub>), 1.65 (m, 4H, CH<sub>2</sub>), 1.37 (m, 2H, CH<sub>2</sub>). FT-IR (KBr, cm<sup>-1</sup>): 2940 (ν<sub>CH<sub>2</sub>-</sub>), 1723 (ν<sub>C=O</sub>), 1175 (ν<sub>C-O-C</sub>).

### Scheme S5. Synthesis of poly-**3d**<sub>75</sub>

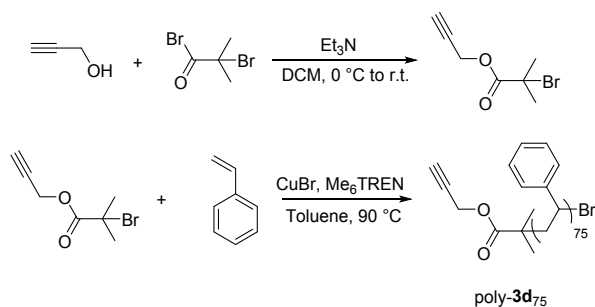

Poly-**3d**<sub>75</sub> was synthesized according the literature with slight modification.<sup>[10]</sup> The propynol (1.0 g, 14.3 mmol), CH<sub>2</sub>Cl<sub>2</sub> (50 mL) and Et<sub>3</sub>N (6.3 mL) were added in a 100 mL reaction flask and the mixture stirred at 0 °C. 2-bromo-2-methylpropanoyl bromide (3.1 g, 13.5 mmol) was added to the solution gradually. Then, the reaction solution was warmed to room temperature and reacted for another 2 h. After the complete consuming of 2-bromo-2-methylpropanoyl bromide, the residual solvent was removed by evaporation. The crude product was purified by silica gel chromatography using petroleum ether/EtOAc (v/v = 4: 1) as eluent to afford the desired product as yellow oil (2.7 g, 90% yield). <sup>1</sup>H NMR (600 MHz, CDCl<sub>3</sub>, 25 °C): δ 4.73 (d, 2H, CH<sub>2</sub>), 2.50 (t, 1H, alkyne), 1.92 (m, 6H, CH<sub>3</sub>).

A 10.0 mL oven-dried flask was then evacuated on a vacuum line and flushed with dry nitrogen. After the evacuation-flush procedure had been repeated three times, CuBr (10.2 mg, 0.071 mmol) was added. Then, a solution of ATRP initiator (18.5 mg, 0.09 mmol in dry toluene, 0.50 mL), a solution of styrene (711 mg in dry toluene, 6.0 mL) and ligand Me<sub>6</sub>TREN (20.7 mg, 0.09 mmol in dry toluene, 0.50 mL) was added via a syringe at room temperature. The reaction flask was then immersed into a pre-heated oil bath at 90 °C and stirred for 5 h. After cooled to room temperature, the polymerization solution was precipitated into a large amount of methanol, collected by centrifugation, and dried in vacuum at room temperature overnight to give poly-**3d**<sub>75</sub> as a white solid (570 mg, 80% yield). SEC:  $M_n = 7.8$  kDa,  $M_w/M_n$



= 1.22.  $^1\text{H NMR}$  (600 MHz,  $\text{CDCl}_3$ , 25 °C):  $\delta$  7.23–6.26 (brs, 5H, aromatic), 2.48–0.68 (brs, 3H,  $\text{CHCH}_2$ ). FT-IR (KBr,  $\text{cm}^{-1}$ ): 3000 ( $\nu_{\text{C-H}}$ ), 2923 ( $\nu_{\text{C-H}_2}$ ), 1580 ( $\nu_{\text{C=C}}$ ), 1372 ( $\nu_{\text{C-H}}$ ).

**Small molecule for end-functionalization of polyisocyanide.** Taking poly-**1a**<sub>20</sub>-R<sub>2a</sub> as an example. Poly-**1a**<sub>20</sub> was synthesized follow steps above mentioned, then the ligand exchange reaction was carried out according the literature.<sup>2</sup> Poly-**1a**<sub>20</sub> (50.2 mg, 0.017 mmol, 1.0 eq) and **L**<sub>1</sub> (49.1 mg, 0.085 mmol, 5.0 eq) were added to a 10 mL oven-dried flask, then aykne-R<sub>2a</sub> (7.8 mg, 0.026 mmol, 1.5 eq), CuI (4.3 mg, 0.023 mmol, 0.87 eq.), THF (4.0 mL) and Et<sub>3</sub>N (4.0 mL) under N<sub>2</sub> atmosphere. The reaction solution was stirred at 55 °C overnight. After the solution was cooled to room temperature, the solvent was removed under reduced pressure. The crude product was redissolved in a small amount of CH<sub>2</sub>Cl<sub>2</sub>, the solution was precipitated into a large amount of methanol and collected via filtration to obtain poly-**1a**<sub>20</sub>-R<sub>2a</sub> as light yellow solid (46.8 mg, 85% yield). SEC:  $M_n = 2.4$  kDa,  $M_w/M_n = 1.05$ .  $^1\text{H NMR}$  (600 MHz,  $\text{CDCl}_3$ , 25 °C):  $\delta$  8.60–7.64 (brs, 1.6H, NH of poly-**1a**<sub>20</sub> segment, and Ar of R<sub>2a</sub>), 7.22–5.40 (brs, 4.2H, Ar of poly-**1a**<sub>20</sub> segment, and Ar of R<sub>2a</sub>), 4.86–3.64 (brs, 2.1H, CO<sub>2</sub>CH<sub>2</sub> of poly-**1a**<sub>20</sub> segment, and CH<sub>2</sub> of R<sub>2a</sub>), 2.90 (s, 0.6H, -N(CH<sub>3</sub>)<sub>2</sub> of R<sub>2a</sub>), 2.52 (t, 0.2H, CH<sub>2</sub> of R<sub>2a</sub>), 1.86–0.63 (brs, 25H, CH<sub>2</sub> and CH<sub>3</sub> of poly-**1a**<sub>20</sub> segment). FT-IR (KBr,  $\text{cm}^{-1}$ ): 2960 ( $\nu_{\text{C-H}}$ ), 2930 ( $\nu_{\text{C-H}}$ ), 2854 ( $\nu_{\text{C-H}}$ ), 1743 ( $\nu_{\text{C=O}}$ ), 1635 ( $\nu_{\text{C=O}}$ ), 1602 ( $\nu_{\text{C=N}}$ ) of poly-**1a**<sub>20</sub> segment. 1534 ( $\nu_{\text{Ar-H}}$ ), 1148 ( $\nu_{\text{O=S=O}}$ ) of R<sub>2a</sub>.

**Typical polymerization procedure of block copolymers.** Taking poly-(**1a**<sub>150</sub>-*b*-**3b**<sub>400</sub>) as an example. Poly-**1a**<sub>150</sub> was synthesized follow steps above mentioned. Poly-**1a**<sub>150</sub> (230 mg, 1.0 eq) was added to a 10 mL oven-dried flask, then **L**<sub>1</sub> (14.5 mg, 0.025 mmol) and THF (2.0 mL) was added with a Pd (II) content of poly-**1a**<sub>150</sub>. The solution was stirred 3 h at room temperature. After the ligand exchange was completed, poly-**3b**<sub>400</sub> (236 mg, 0.008 mmol, 1.5 eq) dissolved in THF (2.0 mL), Et<sub>3</sub>N (4.0 mL) and CuI (4.3 mg, 0.023 mmol) were added under N<sub>2</sub> atmosphere, then the flask was immersed in an oil bath heated at 55 °C overnight. The solution was precipitated with a large amount of methanol, the yellow solid collected via filtration and washed with acetone three times repeatedly to remove the unreacted homopolymer poly-**1a**<sub>150</sub>. Poly-(**1a**<sub>150</sub>-*b*-**3b**<sub>400</sub>) was obtained (320.5 mg, 83% yield). SEC:  $M_n = 25.8$  kDa,  $M_w/M_n = 1.15$ .  $^1\text{H}$

NMR (600MHz, CDCl<sub>3</sub>, 25 °C):  $\delta$ 7.69–6.86 (brs, 2H, Ar-*H* of poly-**1a**<sub>150</sub> segment), 6.04–5.36 (brs, 2H, Ar-*H* of poly-**1a**<sub>150</sub> segment), 5.16 (m, 2.8H, *CH* of poly-**3b**<sub>400</sub> segment), 4.57–3.44 (brs, 2H, CO<sub>2</sub>CH<sub>2</sub> of poly-**1a**<sub>150</sub> segment), 1.83–0.69 (brs, 27.5H, CH<sub>2</sub> and CH<sub>3</sub> of poly-**1a**<sub>150</sub> segment, and CH<sub>3</sub> of poly-**3b**<sub>400</sub> segment). FT-IR (KBr, cm<sup>-1</sup>): 2960 ( $\nu_{C-H}$ ), 2924 ( $\nu_{C-H}$ ), 2847 ( $\nu_{C-H}$ ), 1715 ( $\nu_{C=O}$ ), 1602 ( $\nu_{C=N}$ ) of poly-**1a**<sub>150</sub> segment. 2991 ( $\nu_{C-H}$ ), 1759 ( $\nu_{C=O}$ ), 1099 ( $\nu_{C-O-C}$ ) of poly-**3b**<sub>400</sub> segment.

**Polyisocyanides chain extension through end-functionalization:** After the ligand exchange of poly-**1a**<sub>150</sub> (110.0 mg) according to the above steps, then 1,4-diethynyl-benzene (1.2 mg, 0.01 mmol), Et<sub>3</sub>N (4 mL) and CuI (4.3 mg, 0.023 mmol) were added to a 10 mL oven-dried flask. After reacting at 55 °C overnight, it was precipitated in a large amount of methanol and washed with acetone three times. Follow the above steps to end-functionalize with alkynyl- polyisocyanide and poly-**1a**<sub>150</sub>(**L**<sub>1</sub>). After the reaction is complete, the molecular mass of poly-**1a**<sub>150+150</sub> was approximately twice than poly-**1a**<sub>150</sub> measured by SEC analysis. (182.7 mg, 83% yield). SEC:  $M_n = 31.3$  kDa,  $M_w/M_n = 1.22$ .

Use the method of end group functionalization to connect the polymer end with terpyridine (TPY) group *M*-poly-**1b**<sub>150</sub>-TPY (410 mg). *M*-poly-**1b**<sub>150</sub>-TPY, ZnClO<sub>4</sub>·6H<sub>2</sub>O (1.5 mg, 0.004 mmol) were added to a 10 mL oven-dried flask. Add 4 mL THF and 2 mL MeCN to the reaction flask under N<sub>2</sub> atmosphere, After reacting at 80 °C for 24h, samples were taken and analyzed by SEC to monitor the progress of the reaction. After adding 60.2 mg of *M*-poly-**1b**<sub>150</sub>-TPY to the reaction flask, SEC analysis showed that almost all *M*-poly-**1b**<sub>150</sub>-TPY was converted to *M*-poly-**1b**<sub>150+150</sub>. The reaction solution was precipitated with methanol to obtain a polymer, and then washed with acetone three times repeatedly, and finally a yellow solid was obtained (372.8 mg, 79% yield). SEC:  $M_n = 31.6$  kDa,  $M_w/M_n = 1.23$ .

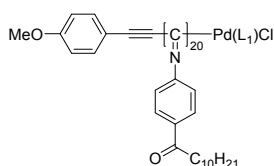

**poly-1a<sub>20</sub>(L<sub>1</sub>):** SEC:  $M_n = 2.3$  kDa,  $M_w/M_n = 1.08$ . <sup>1</sup>H NMR (600MHz, CDCl<sub>3</sub>, 25 °C):  $\delta$  8.26–7.21 (brs, 3.3H, Ar-*H* of poly-1a<sub>20</sub> segment and L<sub>1</sub>), 6.14–5.45 (brs, 2H, Ar-*H* of poly-1a<sub>20</sub> segment and CH of L<sub>1</sub>), 4.57–3.50 (brs, 2H, CO<sub>2</sub>CH<sub>2</sub> of poly-1a<sub>20</sub> segment and -NH- of L<sub>1</sub>), 2.53 (m, 0.04H, CH<sub>2</sub> of L<sub>1</sub>), 2.05–0.73 (brs, 19.5H, CH<sub>2</sub> and CH<sub>3</sub> of poly-1a<sub>20</sub> segment and L<sub>1</sub>). <sup>31</sup>P NMR (121.5 MHz, CDCl<sub>3</sub>, 25 °C):  $\delta$  (ppm) 13.92, 13.91. FT-IR (KBr, cm<sup>-1</sup>): 2961 ( $\nu_{C-H}$ ), 2933 ( $\nu_{C-H}$ ), 2852 ( $\nu_{C-H}$ ), 1741 ( $\nu_{C=O}$ ), 1633 ( $\nu_{C=O}$ ), 1608 ( $\nu_{C=N}$ ) of poly-1a<sub>20</sub> segment.

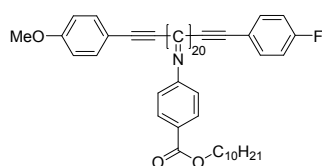

**poly-1a<sub>20</sub>-R<sub>2b</sub>:** SEC:  $M_n = 2.4$  kDa,  $M_w/M_n = 1.07$ . <sup>1</sup>H NMR (600MHz, CDCl<sub>3</sub>, 25 °C):  $\delta$  8.25–7.18 (brs, 2.2H, Ar-*H* of poly-1a<sub>20</sub> segment and Ar-*H* of R<sub>2b</sub>), 7.00 (m, 0.2H, Ar-*H* of R<sub>2b</sub>), 6.14–5.45 (brs, 2H, Ar-*H* of poly-1a<sub>20</sub> segment), 4.57–3.50 (brs, 2H, CO<sub>2</sub>CH<sub>2</sub> of poly-1a<sub>20</sub> segment), 2.05–0.73 (brs, 19H, CH<sub>2</sub> and CH<sub>3</sub> of poly-1a<sub>20</sub> segment). FT-IR (KBr, cm<sup>-1</sup>): 2960 ( $\nu_{C-H}$ ), 2930 ( $\nu_{C-H}$ ), 2854 ( $\nu_{C-H}$ ), 1743 ( $\nu_{C=O}$ ), 1635 ( $\nu_{C=O}$ ), 1602 ( $\nu_{C=N}$ ) of poly-1a<sub>20</sub> segment. 2934( $\nu_{Ar-H}$ ), 1050 ( $\nu_{C-F}$ ) of R<sub>2b</sub>.

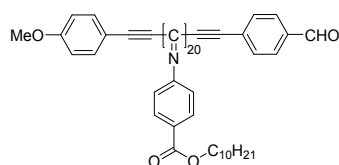

**poly-1a<sub>20</sub>-R<sub>2c</sub>:** SEC:  $M_n = 2.5$  kDa,  $M_w/M_n = 1.04$ . <sup>1</sup>H NMR (600 MHz, CDCl<sub>3</sub>, 25 °C):  $\delta$  9.76 (s, H, CHO of R<sub>2c</sub>) 8.09–6.99 ((brs, 2.4H, Ar-*H* of poly-1a<sub>20</sub> segment and Ar-*H* of R<sub>2c</sub>), 6.20–5.37 (brs, 2H, Ar-*H* of poly-1a<sub>20</sub> segment), 4.58–3.43 (brs, 2H, CO<sub>2</sub>CH<sub>2</sub> of poly-1a<sub>20</sub> segment), 2.09–0.65 (brs, 19H, CH<sub>2</sub> and CH<sub>3</sub> of poly-1a<sub>20</sub> segment). FT-IR (KBr, cm<sup>-1</sup>): 2960 ( $\nu_{C-H}$ ), 2930 ( $\nu_{C-H}$ ), 2854 ( $\nu_{C-H}$ ), 1743 ( $\nu_{C=O}$ ), 1635 ( $\nu_{C=O}$ ), 1602 ( $\nu_{C=N}$ ) of poly-1a<sub>20</sub> segment. 2968( $\nu_{Ar-H}$ ), 1693 ( $\nu_{-CHO}$ ) of R<sub>2c</sub>.

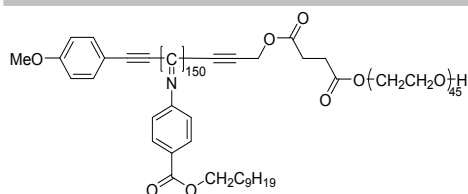

**poly(1a<sub>150</sub>-b-3a<sub>45</sub>):** SEC:  $M_n = 15.9$  kDa,  $M_w/M_n = 1.18$ .  $^1\text{H}$  NMR (600MHz,  $\text{CDCl}_3$ , 25 °C):  $\delta$  8.36–7.00 (brs, 2H, Ar-*H* of poly-1a<sub>150</sub> segment), 6.12–5.36 (brs, 2H, Ar-*H* of poly-1a<sub>150</sub> segment), 4.68 (d, 0.013H,  $\text{CH}_2$  of poly-3a<sub>45</sub> segment), 4.58–3.67 (brs, 3.2H,  $\text{CO}_2\text{CH}_2$  of poly-1a<sub>150</sub> segment, and  $\text{CH}_2\text{CH}_2\text{O}$  of poly-3a<sub>45</sub> segment), 2.67 (s, 0.027H,  $\text{CH}_2$  of poly-3a<sub>45</sub> segment), 2.08–0.57 (brs, 19H,  $\text{CH}_2$  and  $\text{CH}_3$  of poly-1a<sub>150</sub> segment). FT-IR (KBr,  $\text{cm}^{-1}$ ): 2960 ( $\nu_{\text{C-H}}$ ), 2930 ( $\nu_{\text{C-H}}$ ), 1714 ( $\nu_{\text{C=O}}$ ), 1602 ( $\nu_{\text{C=N}}$ ) of poly-1a<sub>150</sub> segment. 2858 ( $\nu_{\text{CH}_2}$ ), 1087 ( $\nu_{\text{C-O-C}}$ ) of poly-3a<sub>45</sub> segment.

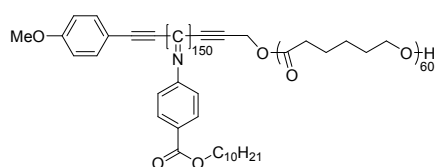

**poly(1a<sub>150</sub>-b-3c<sub>60</sub>):** SEC:  $M_n = 19.3$  kDa,  $M_w/M_n = 1.20$ .  $^1\text{H}$  NMR (600MHz,  $\text{CDCl}_3$ , 25 °C):  $\delta$  8.30–6.98 (brs, 2H, Ar-*H* of poly-1a<sub>150</sub> segment), 6.15–5.24 (brs, 2H, Ar-*H* of poly-1a<sub>150</sub> segment), 4.62–3.43 (brs, 2.8H,  $\text{CO}_2\text{CH}_2$  of poly-1a<sub>150</sub> segment and  $\text{CH}_2$  of poly-3c<sub>60</sub> segment), 2.46–2.22 (t, 0.8H,  $\text{CH}_2$  of poly-2c<sub>60</sub> segment), 2.06–0.56 (brs, 21.4H,  $\text{CH}_2\text{CH}_3$  of poly-1a<sub>150</sub> segment and  $\text{CH}_2$  of poly-3c<sub>60</sub> segment). FT-IR (KBr,  $\text{cm}^{-1}$ ): 2917 ( $\nu_{\text{C-H}}$ ), 2847 ( $\nu_{\text{C-H}}$ ), 1718 ( $\nu_{\text{C=O}}$ ), 1597 ( $\nu_{\text{C=N}}$ ) of poly-1a<sub>150</sub> segment. 2961 ( $\nu_{\text{CH}_2}$ ), 1723 ( $\nu_{\text{C=O}}$ ), 1154 ( $\nu_{\text{C-O-C}}$ ) of poly-3c<sub>60</sub> segment.

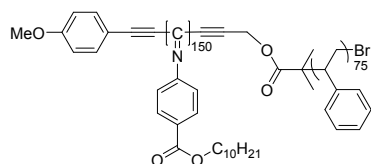

**poly(1a<sub>150</sub>-b-3d<sub>75</sub>):** SEC:  $M_n = 20.8$  kDa,  $M_w/M_n = 1.18$ .  $^1\text{H}$  NMR (600MHz,  $\text{CDCl}_3$ , 25 °C):  $\delta$  8.14–6.17 (brs, 4.5H, Ar-*H* of poly-1a<sub>150</sub> segment and Ar-*H* of poly-3d<sub>75</sub> segment), 6.11–5.20 (brs, 2H, Ar-*H* of poly-1a<sub>150</sub> segment), 4.71–3.36 (brs, 2H,  $\text{CO}_2\text{CH}_2$  of poly-1a<sub>150</sub> segment), 2.30–0.48 (brs, 20.5H,  $\text{CH}_2$  and  $\text{CH}_3$  of poly-1a<sub>150</sub> segment, and  $\text{CHCH}_2$  of poly-3d<sub>75</sub> segment). FT-IR (KBr,  $\text{cm}^{-1}$ ): 2925 ( $\nu_{\text{C-H}}$ ),

2854 ( $\nu_{\text{C-H}}$ ), 1743 ( $\nu_{\text{C=O}}$ ), 1602 ( $\nu_{\text{C=N}}$ ) of poly-**1a**<sub>150</sub> segment. 1580 ( $\nu_{\text{C=C}}$ ), 1372 ( $\nu_{\text{C-H}}$ ), 1007 ( $\nu_{\text{=CH}}$ ) of poly-**3d**<sub>75</sub> segment

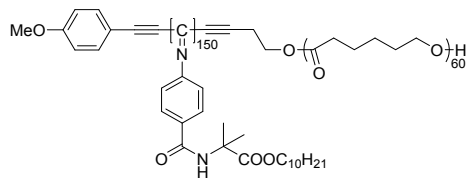

**poly(1b<sub>150</sub>-b-3c<sub>60</sub>)**: SEC:  $M_n = 23.3$  kDa,  $M_w/M_n = 1.45$ .  $^1\text{H}$  NMR (600MHz,  $\text{CDCl}_3$ , 25 °C):  $\delta$  8.60–7.64 (brs, H, NH of poly-**1b**<sub>150</sub> segment), 7.22–5.40 (brs, 4H, Ar of poly-**1b**<sub>150</sub> segment), 4.86–3.30 (brs, 2.5H,  $\text{CO}_2\text{CH}_2$  of poly-**1b**<sub>150</sub> segment, and  $\text{CH}_2$  of poly-**3c**<sub>60</sub> segment), 2.43–2.19 (t, 0.5H,  $\text{CH}_2$  of poly-**3c**<sub>60</sub> segment), 1.95–0.5 (brs, 26.5H,  $\text{CH}_2\text{CH}_3$  of poly-**1b**<sub>150</sub> segment, and  $\text{CH}_2$  of poly-**2c**<sub>60</sub> segment). FT-IR (KBr,  $\text{cm}^{-1}$ ): 2960 ( $\nu_{\text{C-H}}$ ), 2930 ( $\nu_{\text{C-H}}$ ), 2854 ( $\nu_{\text{C-H}}$ ), 1743 ( $\nu_{\text{C=O}}$ ), 1635 ( $\nu_{\text{C=O}}$ ), 1602 ( $\nu_{\text{C=N}}$ ) of poly-**1b**<sub>150</sub> segment. 2940 ( $\nu_{\text{CH}_2}$ ), 1723 ( $\nu_{\text{C=O}}$ ), 1175 ( $\nu_{\text{C-O-C}}$ ) of poly-**3c**<sub>60</sub> segment.

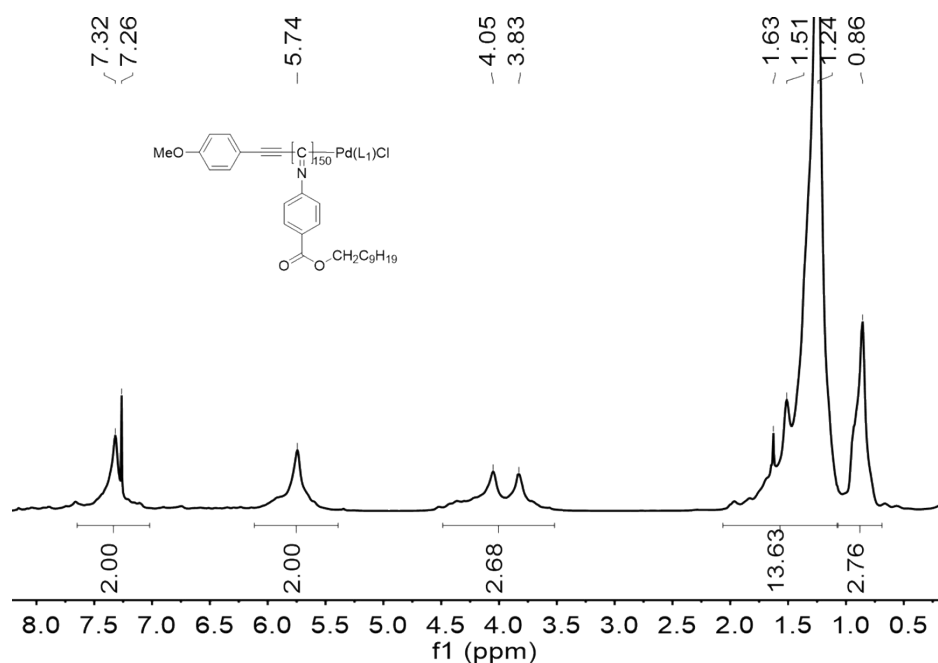

**Figure S1.**  $^1\text{H}$  NMR (600 MHz) spectrum of poly-**1a**<sub>150</sub> measured in  $\text{CDCl}_3$  at 25 °C.

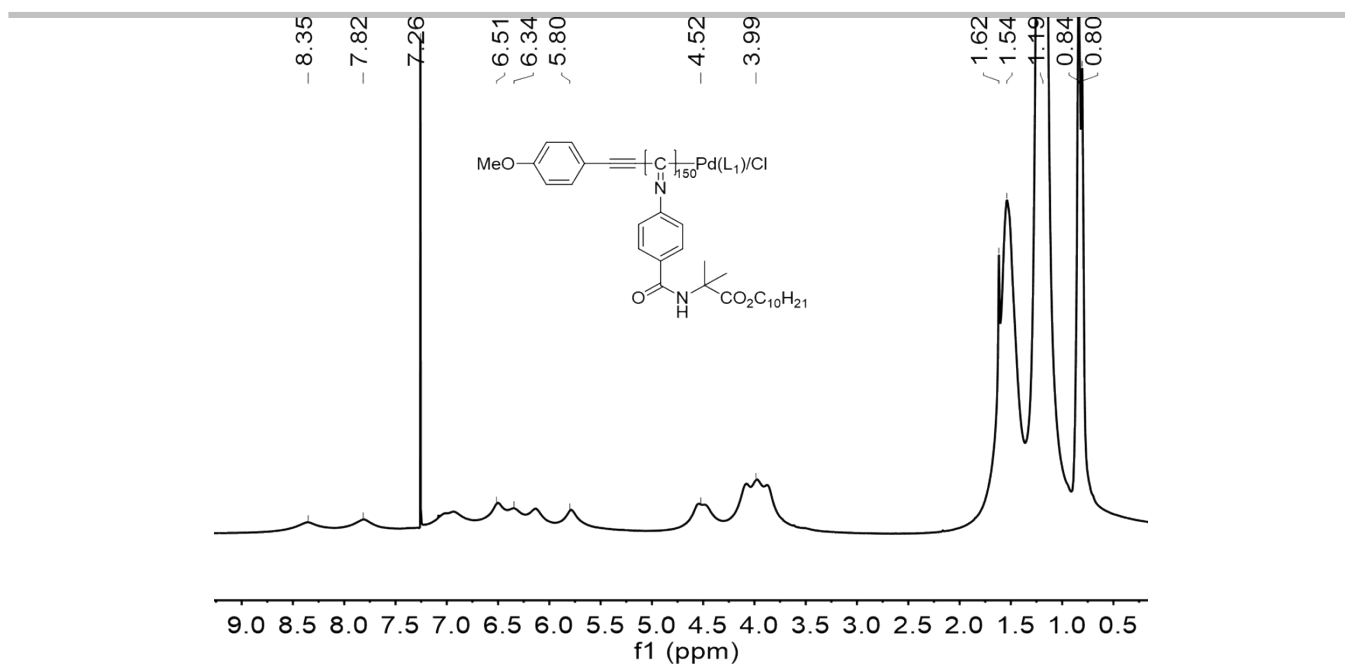

**Figure S2.**  $^1\text{H}$  NMR (600 MHz) spectrum of poly-**1b**<sub>150</sub> measured in  $\text{CDCl}_3$  at 25 °C.

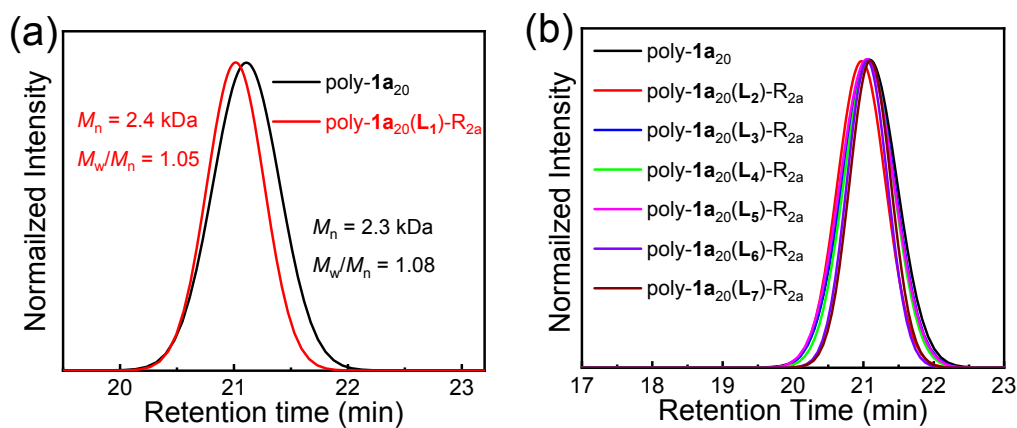

**Figure S3.** SEC curves of poly-**1a**<sub>20</sub> and poly-**1a**<sub>20</sub>(**L**<sub>1</sub>)-**R**<sub>2a</sub> (a), poly-**1a**<sub>20</sub> and poly-**1a**<sub>20</sub>(**L**<sub>*n*</sub>)-**R**<sub>2a</sub> (b).

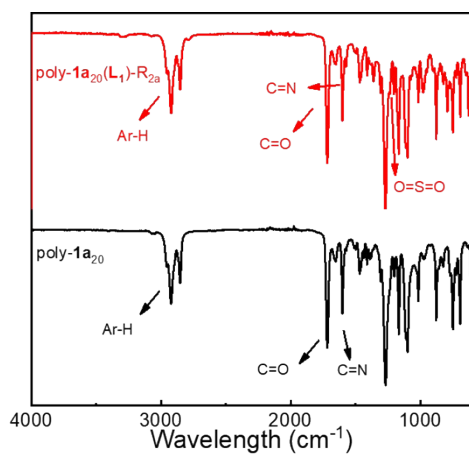

**Figure S4.** FT-IR spectra of poly-**1a**<sub>20</sub> and poly-**1a**<sub>20</sub>(**L**<sub>1</sub>)-**R**<sub>2a</sub> measured at 25 °C using KBr pellets.

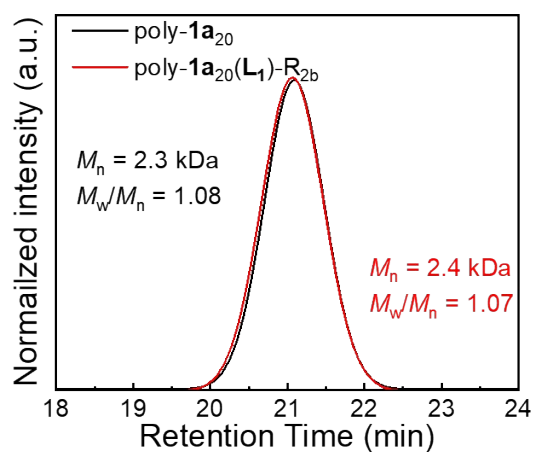

**Figure S5.** SEC curves of poly-**1a**<sub>20</sub> and poly-**1a**<sub>20</sub>(**L**<sub>1</sub>)-**R**<sub>2b</sub>.

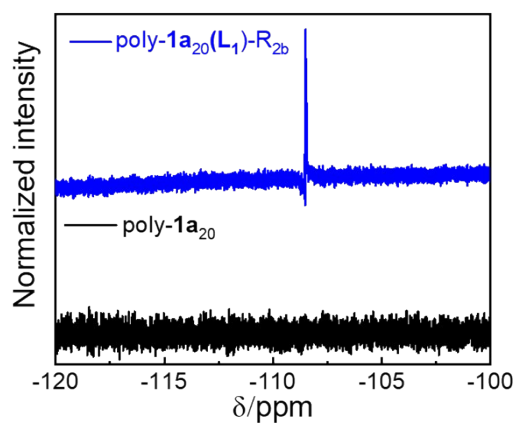

**Figure S6.** <sup>19</sup>F NMR (564 MHz) spectra of poly-**1a**<sub>20</sub> and poly-**1a**<sub>20</sub>(**L**<sub>1</sub>)-**R**<sub>2b</sub> measured in CDCl<sub>3</sub> at 25 °C.

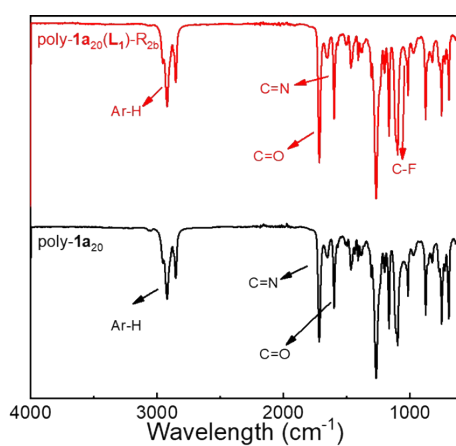

**Figure S7.** FT-IR spectra of poly-**1a**<sub>20</sub> and poly-**1a**<sub>20</sub>(**L**<sub>1</sub>)-**R**<sub>2b</sub> measured at 25 °C using KBr pellets.

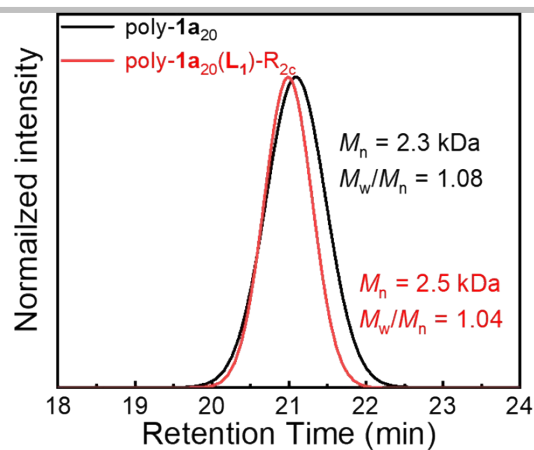

**Figure S8.** SEC curves of poly-**1a**<sub>20</sub> and poly-**1a**<sub>20</sub>(L<sub>1</sub>)-R<sub>2c</sub>.

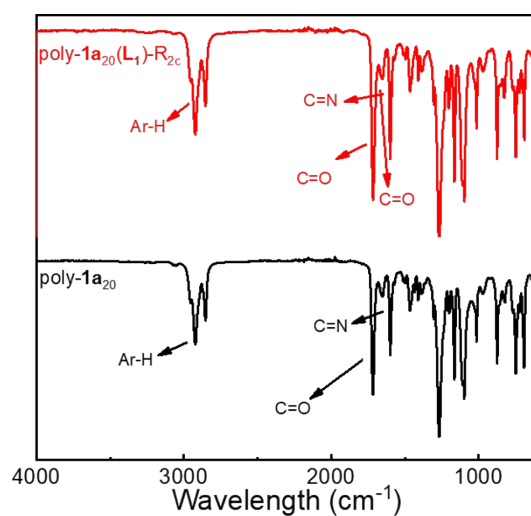

**Figure S9.** FT-IR spectra of poly-**1a**<sub>20</sub>(L<sub>1</sub>) and poly-**1a**<sub>20</sub>(L<sub>1</sub>)-R<sub>2c</sub> measured at 25 °C using KBr pellets.

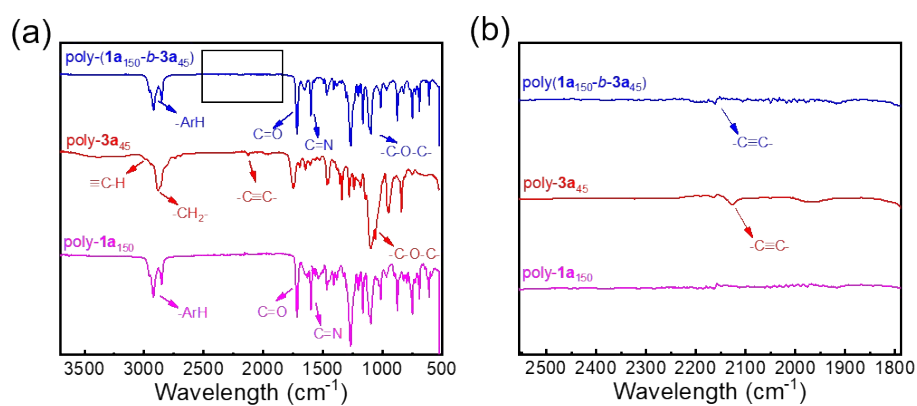

**Figure S10** FT-IR spectrum of poly-**1a**<sub>150</sub>, poly-**3a**<sub>45</sub> and poly(**1a**<sub>150</sub>-*b*-**3a**<sub>45</sub>) measured at 25 °C using KBr pellets.



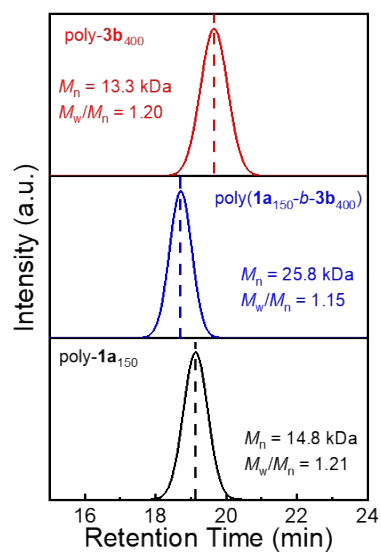

**Figure S11.** SEC curves of poly-1a<sub>150</sub>, poly-3b<sub>400</sub> and poly(1a<sub>150</sub>-b-3b<sub>400</sub>).

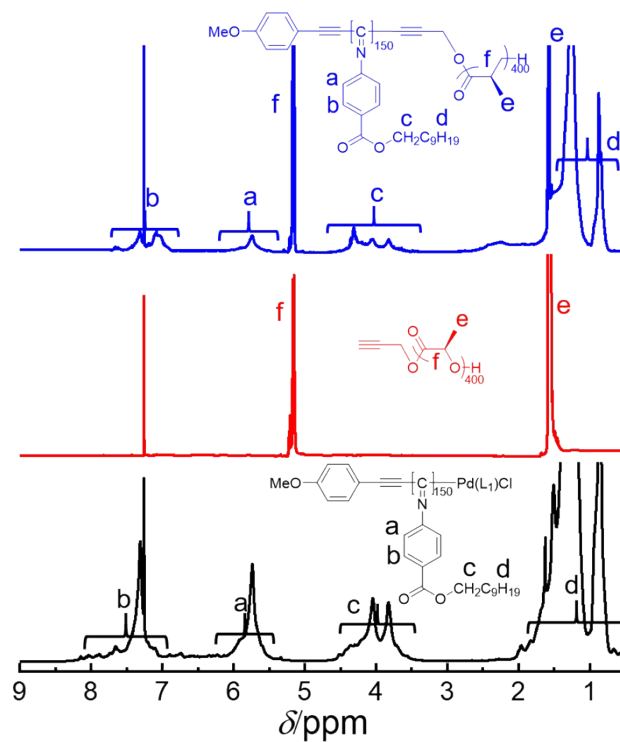

**Figure S12.** <sup>1</sup>H NMR spectra (600 MHz) of poly-1a<sub>150</sub>, poly-3b<sub>400</sub>, and poly(1a<sub>150</sub>-b-3b<sub>400</sub>) in CDCl<sub>3</sub> at 25 °C.

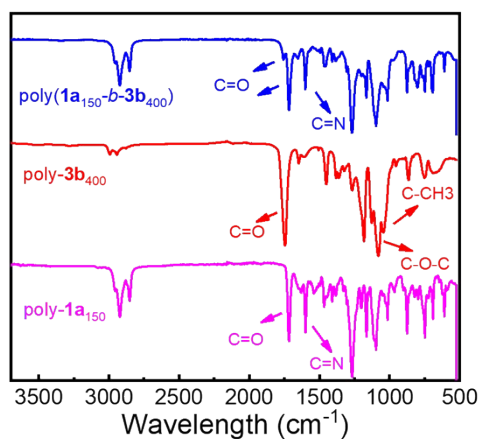

**Figure S13.** FT-IR spectra of poly-**1a**<sub>150</sub>, poly-**3b**<sub>400</sub>, and poly(**1a**<sub>150</sub>-*b*-**3b**<sub>400</sub>) measured at 25 °C using KBr pellets.

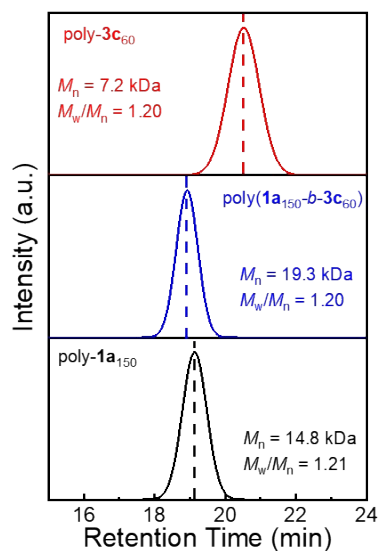

**Figure S14.** SEC curves of poly-**1a**<sub>150</sub>, poly-**3c**<sub>60</sub>, and poly(**1a**<sub>150</sub>-*b*-**3c**<sub>60</sub>).

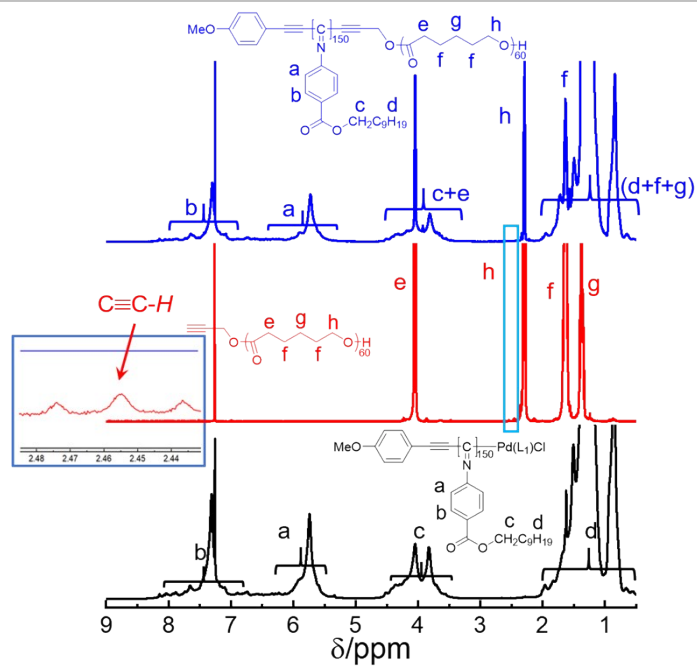

**Figure S15.**  $^1\text{H}$  NMR spectra (600 MHz) of poly-**1a**<sub>150</sub>, poly-**3c**<sub>60</sub>, and poly(**1a**<sub>150</sub>-**b-3c**<sub>60</sub>) in  $\text{CDCl}_3$  at 25 °C.

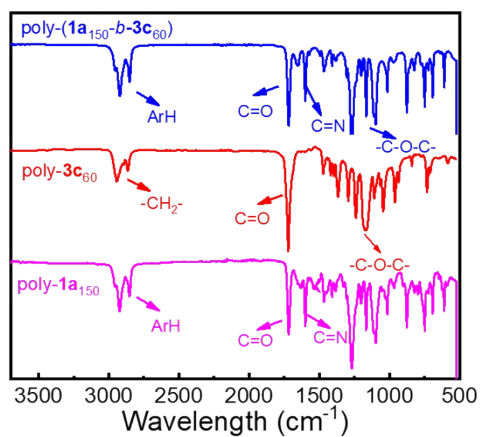

**Figure S16.** FT-IR spectra of poly-**1a**<sub>150</sub>, poly-**3c**<sub>60</sub>, and poly(**1a**<sub>150</sub>-**b-3c**<sub>60</sub>) measured at 25 °C using KBr pellets.

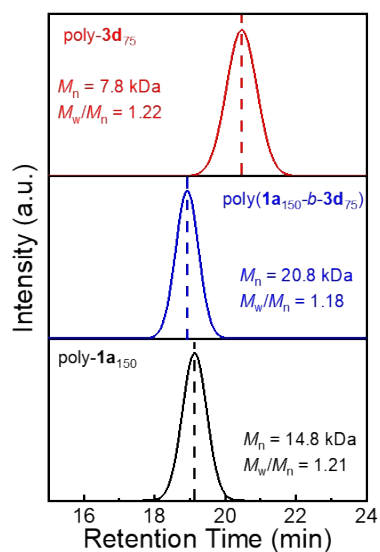

**Figure S17.** SEC curves of poly-**1a**<sub>150</sub>, poly-**3d**<sub>75</sub>, and poly(**1a**<sub>150</sub>-**b-3d**<sub>75</sub>).

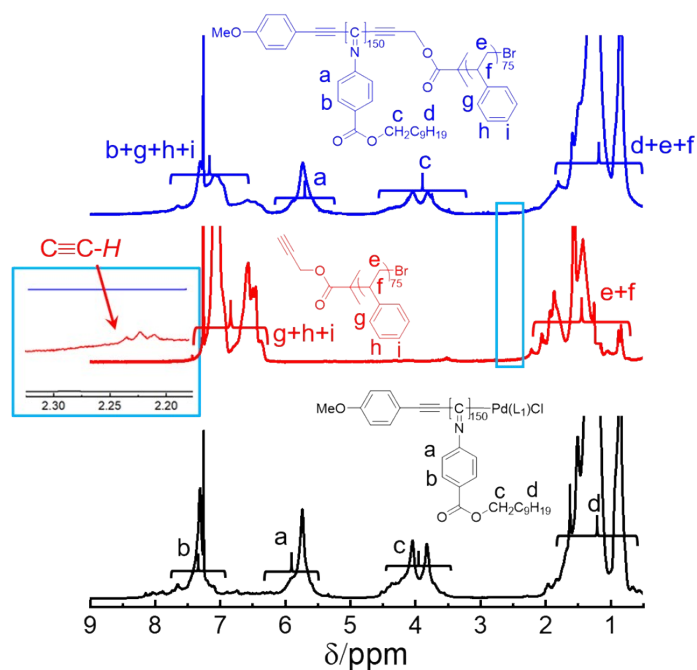

**Figure S18.** <sup>1</sup>H NMR spectra (600 MHz) of poly-**1a**<sub>150</sub>, poly-**3d**<sub>75</sub>, and poly(**1a**<sub>150</sub>-**b-3d**<sub>75</sub>) in CDCl<sub>3</sub> at 25 °C.

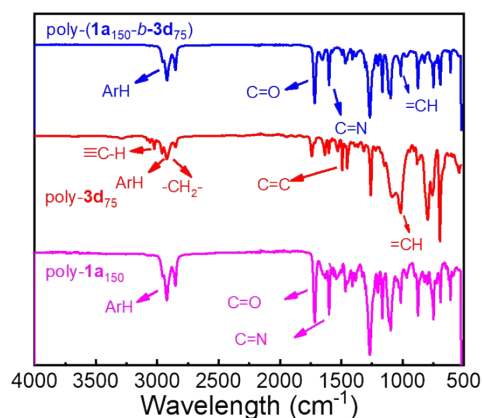

**Figure S19.** FT-IR spectra of poly-**1a**<sub>150</sub>, poly-**3d**<sub>75</sub>, and poly(**1a**<sub>150</sub>-*b*-**3d**<sub>75</sub>) measured at 25 °C using KBr pellets.

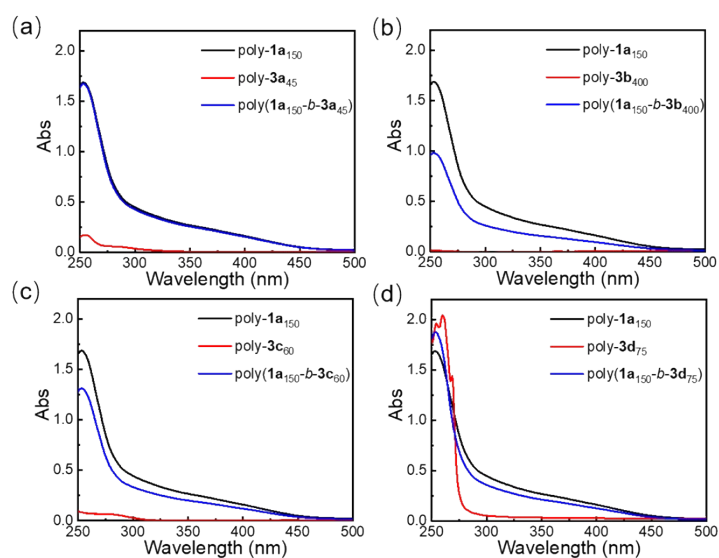

**Figure S20.** UV-vis absorption spectra of homopolymers and block copolymers measured in THF at 25 °C ( $c = 0.01$  mg/mL).

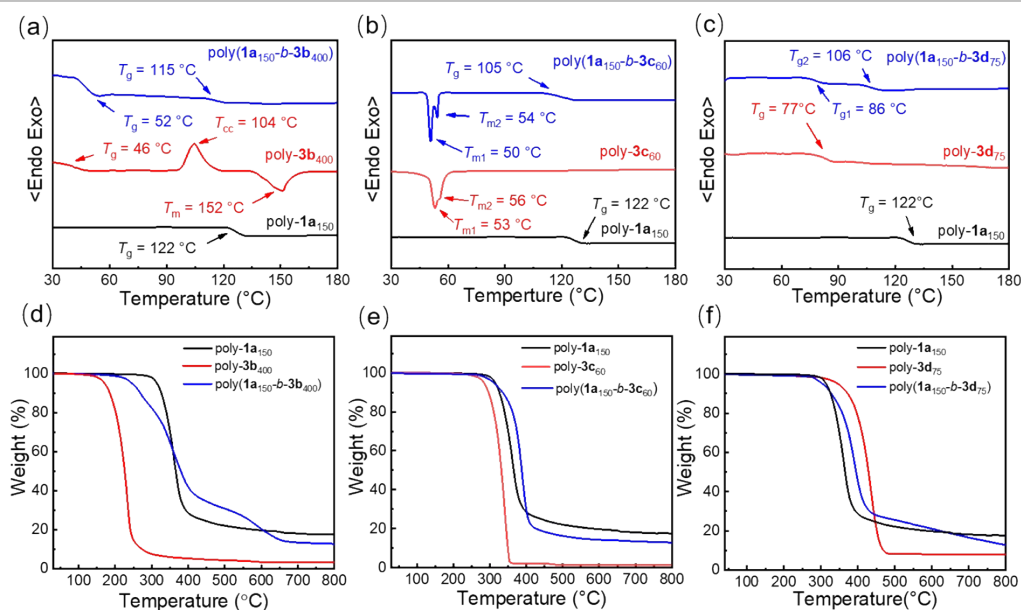

**Figure S21.** (a-c) DSC curves of the homopolymers and block copolymers. (d-f) TGA curves of the homopolymers and block copolymers.

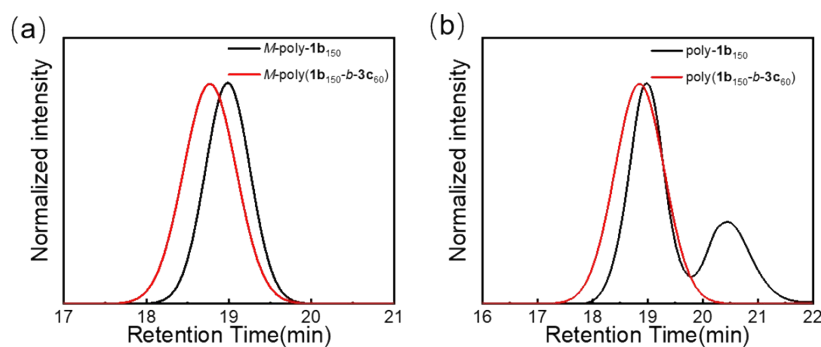

**Figure S22.** (a) SEC curves of *M*-poly-1b<sub>150</sub> and *M*-poly(1b<sub>150</sub>-b-3c<sub>60</sub>). (b) SEC curves of poly-1b<sub>150</sub> and poly(1b<sub>150</sub>-b-3c<sub>60</sub>).

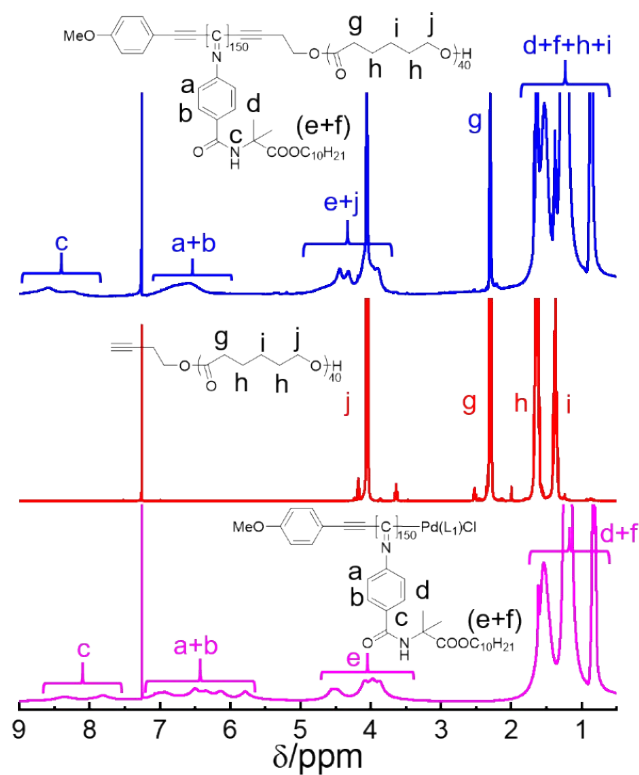

**Figure S23.**  $^1\text{H}$  NMR spectra (600 MHz) of *M*-poly-**1b**<sub>150</sub>, poly-**3c**<sub>60</sub>, and *M*-poly(**1a**<sub>150</sub>-*b*-**3c**<sub>60</sub>) in  $\text{CDCl}_3$  at 25 °C.

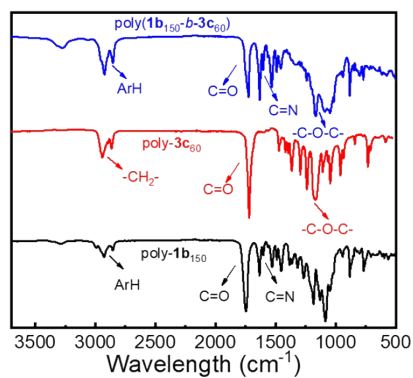

**Figure S24.** FT-IR spectra of poly-**1b**<sub>150</sub>, poly-**3c**<sub>60</sub>, and poly(**1b**<sub>150</sub>-*b*-**3c**<sub>60</sub>) measured at 25 °C using KBr pellets.

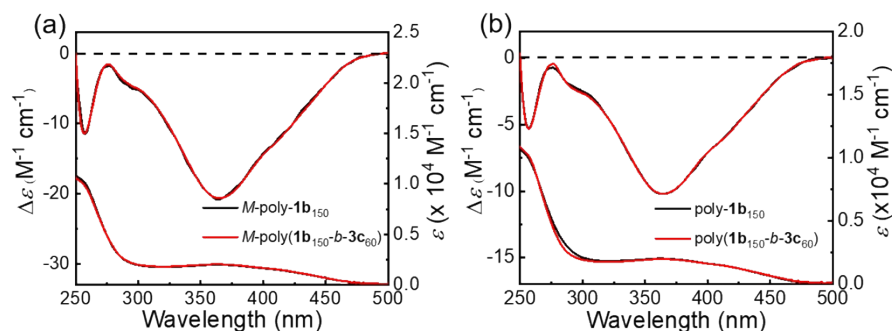

**Figure S25.** (a) CD and UV-vis curves of  $M$ -poly- $1b_{150}$  and  $M$ -poly( $1b_{150}$ - $b$ - $3c_{60}$ ). (b) CD and UV-vis spectra of poly- $1b_{150}$  and poly( $1b_{150}$ - $b$ - $3c_{60}$ ).

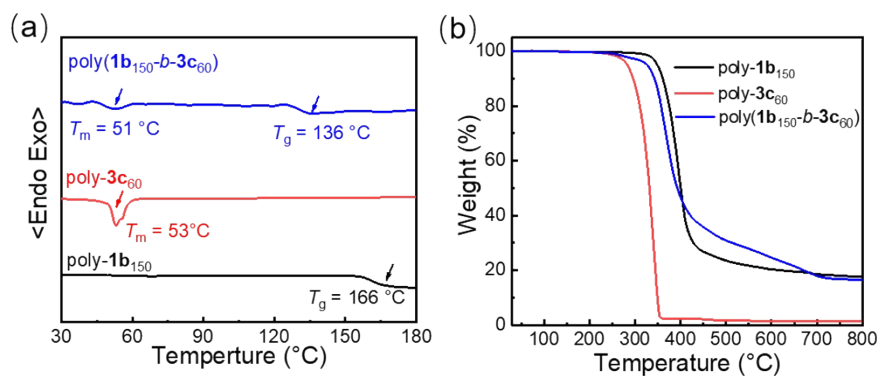

**Figure S26.** (a) DSC curves of the poly- $1b_{150}$ , poly- $3c_{60}$ , and poly( $1b_{150}$ - $b$ - $3c_{60}$ ). (b) TGA curves of the poly- $1b_{150}$ , poly- $3c_{60}$ , and poly( $1b_{150}$ - $b$ - $3c_{60}$ ).

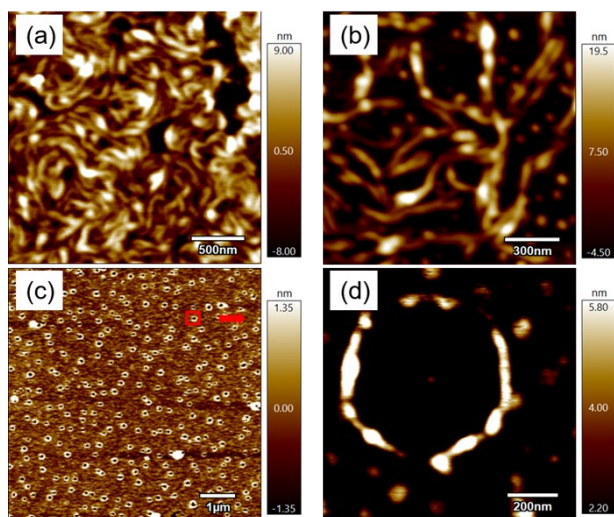

**Figure S27.** AFM height images of poly( $1a_{150}$ - $b$ - $3a_{45}$ ) measured in the mixture of THF and  $n$ -hexane ( $v/v = 10:0$ ) (a); THF:  $n$ -hexane ( $v/v = 8:2$ ) (b); THF:  $n$ -hexane ( $v/v = 6:4$ ) (c). (d) The zoomed image of the red area in Figure c ( $c = 0.05$  mg/mL).



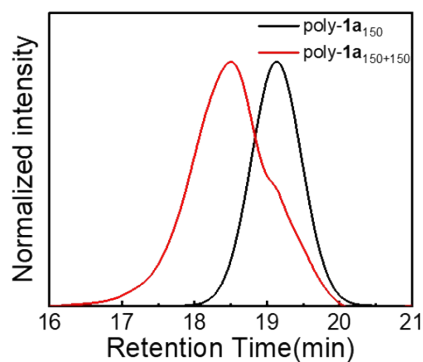

**Figure S28.** SEC curves of poly-**1a**<sub>150+150</sub> is synthesized by one-pot method.

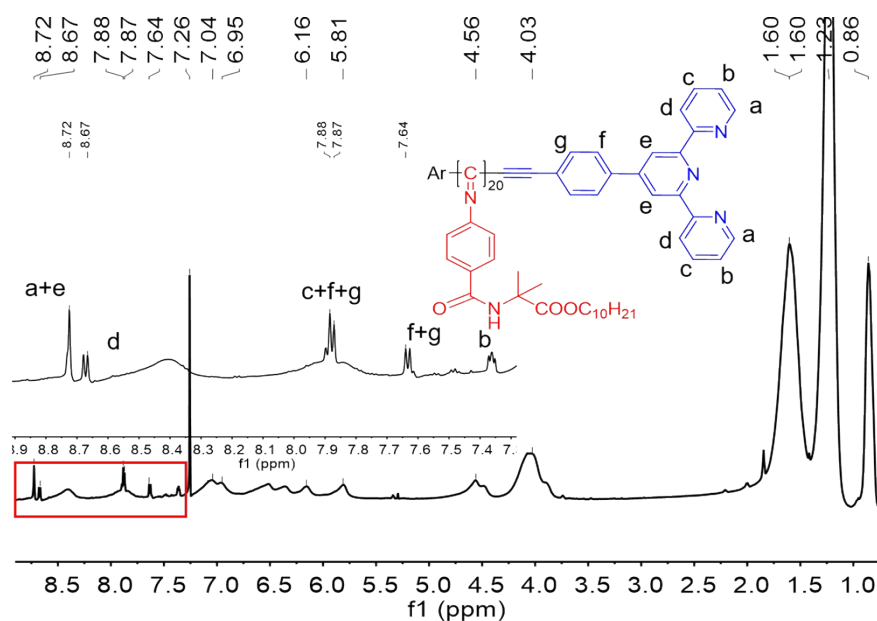

**Figure S29.** <sup>1</sup>H NMR (600 MHz) spectrum of poly-**1b**<sub>20</sub>-(TPY) measured in CDCl<sub>3</sub> at 25 °C.

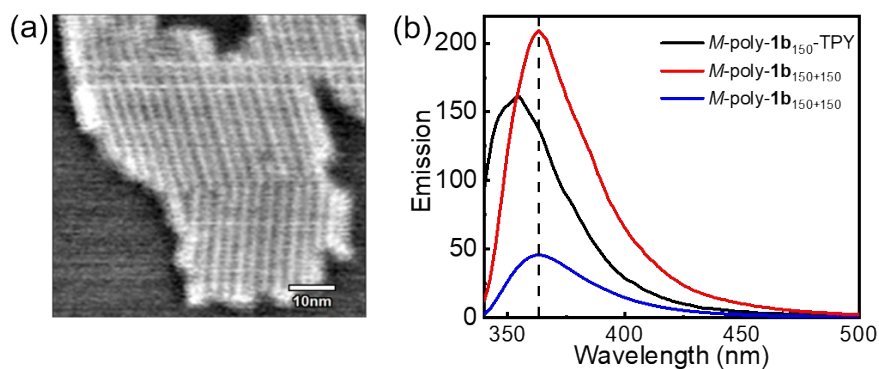

**Figure S30.** (a) AFM phase image of *M*-poly-**1b**<sub>150+150</sub>. (b) Fluorescence spectra of poly-**1b**<sub>150</sub>-TPY and poly-**1b**<sub>150+150</sub> in THF at 25 °C. (The red and black lines indicated a concentration of 0.005 mg/mL, the blue line indicated a concentration of 0.001 mg/mL)

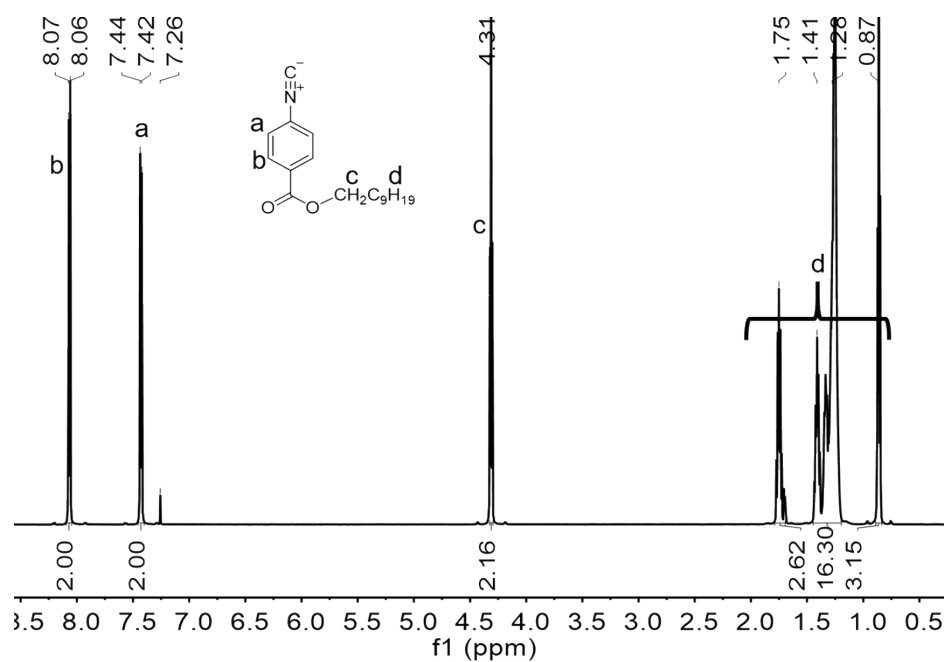

**Figure S31.**  $^1\text{H}$  NMR (600 MHz) spectrum of monomer **1a** measured in  $\text{CDCl}_3$  at  $25\text{ }^\circ\text{C}$ .

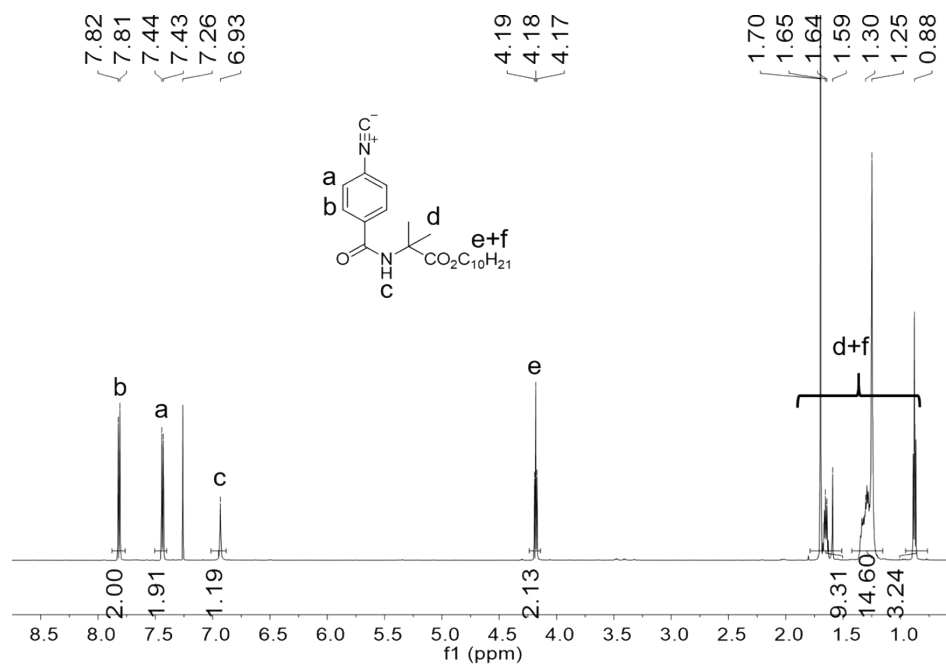

**Figure S32.**  $^1\text{H}$  NMR (600 MHz) spectrum of monomer **1b** measured in  $\text{CDCl}_3$  at  $25\text{ }^\circ\text{C}$ .

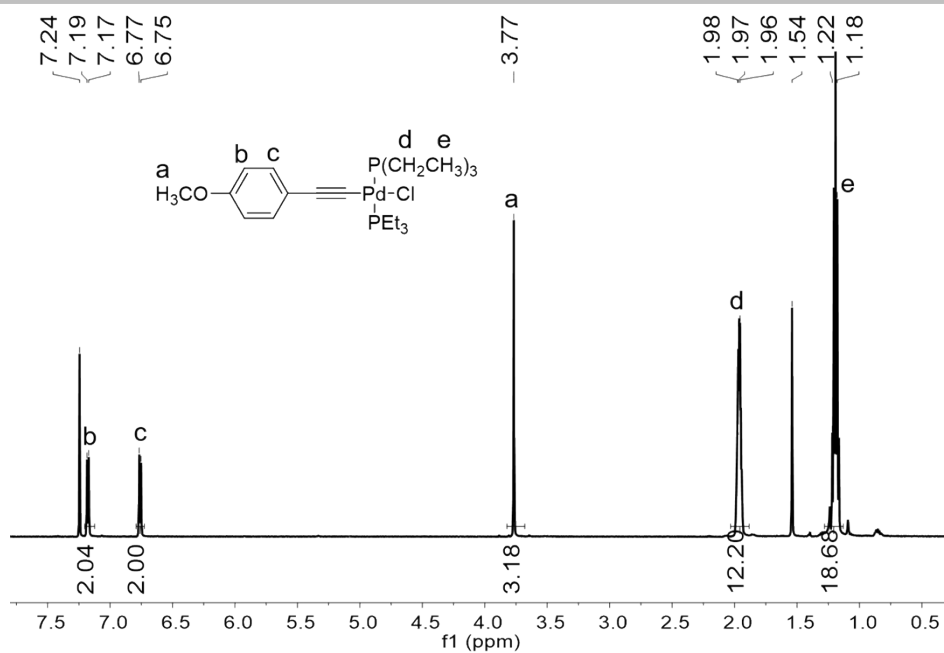

**Figure S33.**  $^1\text{H}$  NMR (600 MHz) spectrum of Pd(II) initiator measured in  $\text{CDCl}_3$  at  $25^\circ\text{C}$ .

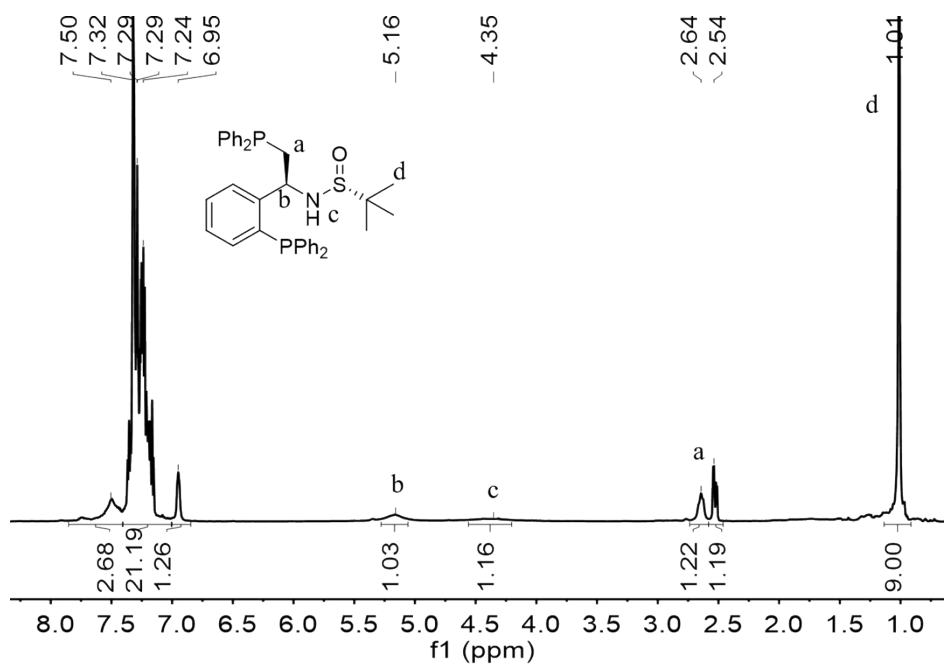

**Figure S34.**  $^1\text{H}$  NMR (600 MHz) spectrum of  $\text{L}_1$  measured in  $\text{CDCl}_3$  at  $25^\circ\text{C}$ .

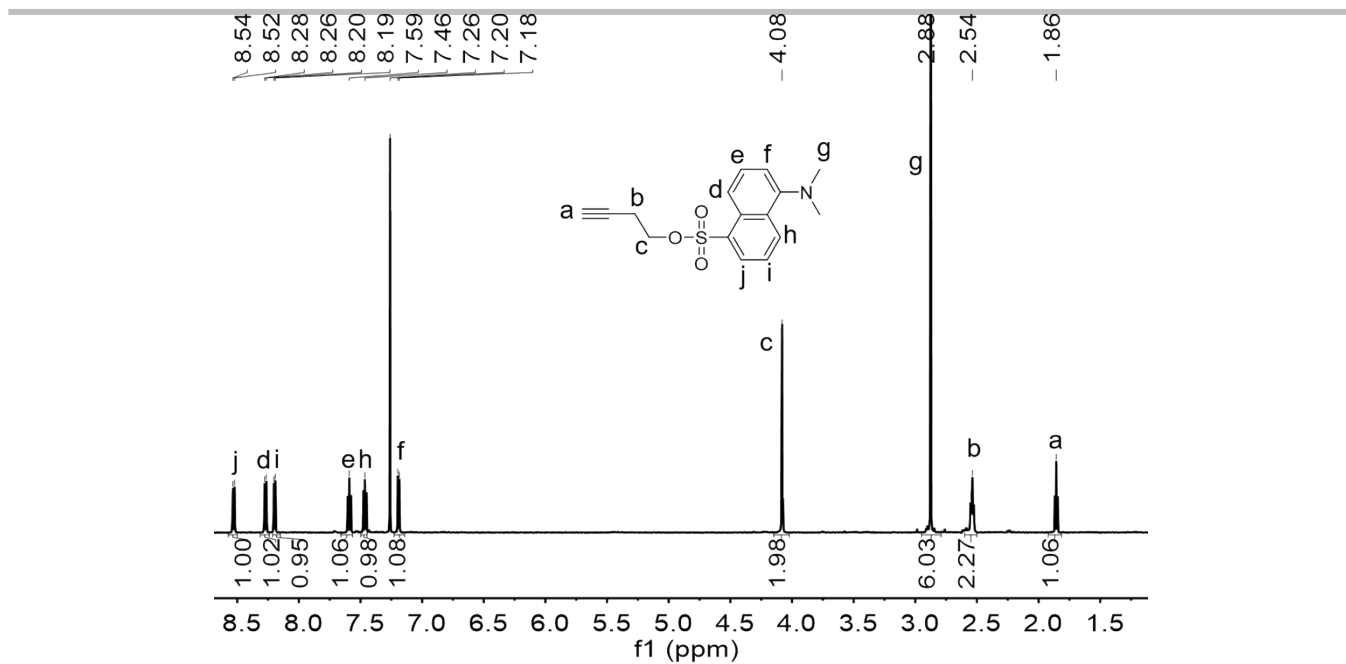

**Figure S35.**  $^1\text{H}$  NMR (600 MHz) spectrum of alkyne- $\text{R}_{2a}$  measured in  $\text{CDCl}_3$  at  $25^\circ\text{C}$ .

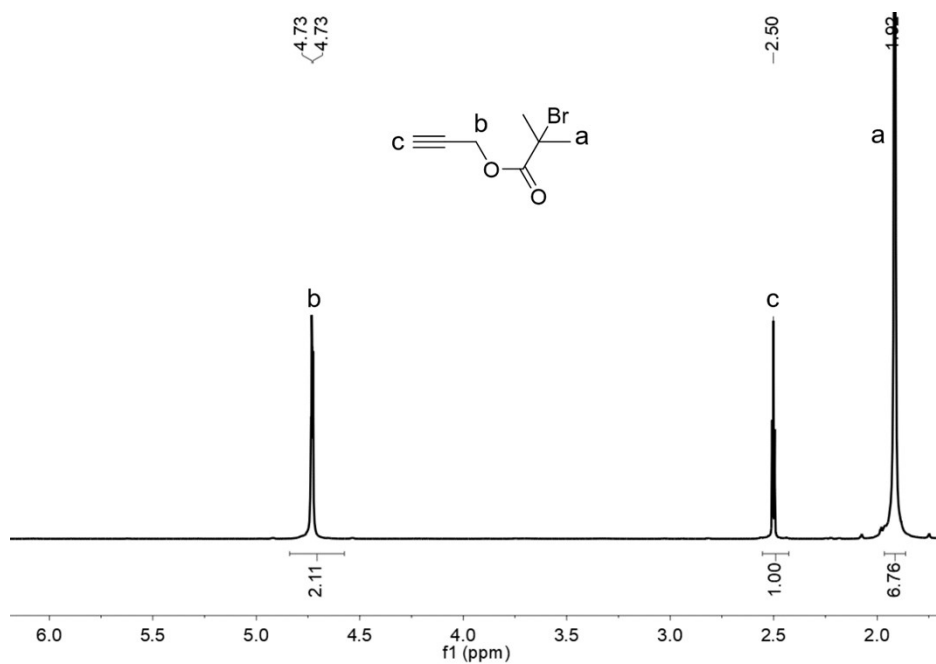

**Figure S36.**  $^1\text{H}$  NMR (600 MHz) spectrum of alkyne-ATRP initiator measured in  $\text{CDCl}_3$  at  $25^\circ\text{C}$ .

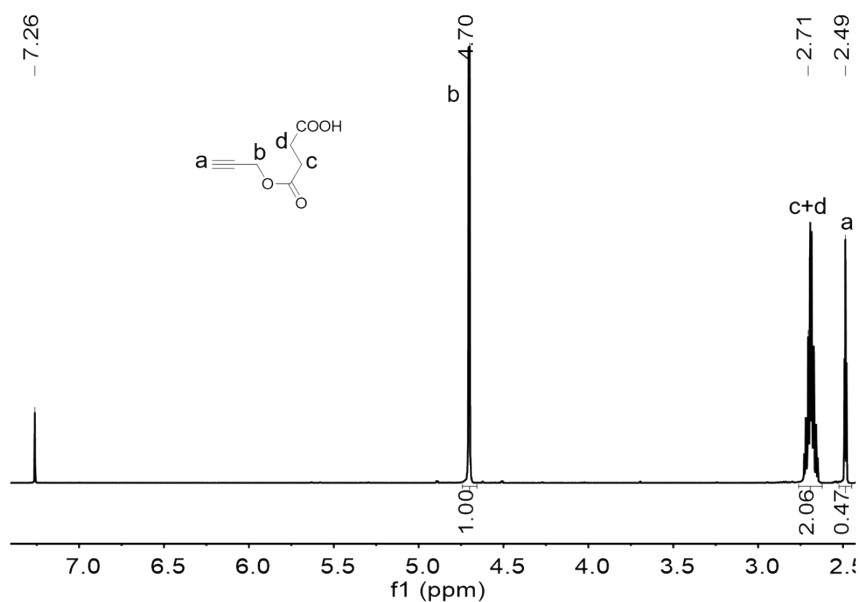

**Figure S37.** <sup>1</sup>H NMR (600 MHz) spectrum of 4-oxo-4-(prop-2-yn-1-yloxy)butanoic acid [4] measured in CDCl<sub>3</sub> at 25 °C.

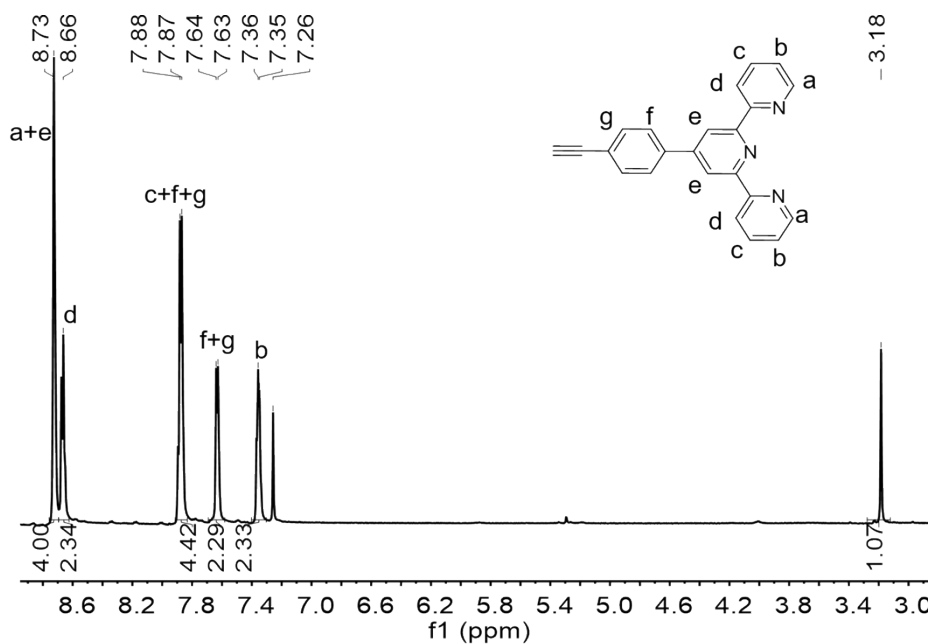

**Figure S38.** <sup>1</sup>H NMR (600 MHz) spectrum of alkylnyl-TPY measured in CDCl<sub>3</sub> at 25 °C.

---

## References

- 1 Y.-X. Xue, Y.-Y. Zhu, L.-M. Gao, X.-Y. He, N. Liu, W.-Y. Zhang, J. Yin, Y. Ding, H. Zhou, Z.-Q. Wu, *J. Am. Chem. Soc.* **2014**, *136*, 4706–4713.
- 2 L.-Zhou, X.-H. Xu, Z.-Q. Jiang, L. Xu, B.-F. Chu, N. Liu, Z.-Q. Wu, *Angew. Chem. Int. Ed.* **2021**, *60*, 806–812.
- 3 W. Zhou, X. Su, M. Tao, C. Zhu, Q. Zhao, J. Zhang, *Angew. Chem.* **2015**, *127*, 15066–15070.
- 4 L. Xu, L. Yang, Z. Guo, N. Liu, Y.-Y. Zhu, Z. Li, Z.-Q. Wu, *Macromolecules* **2019**, *52*, 5698–5706.
- 5 Y.-X. Li, L. Xu, S.-M. Kang, L. Zhou, N. Liu, Z.-Q. Wu, *Angew. Chem. Int. Ed.* **2021**, *60*, 7174–7179.
- 6 T. Kaufmann, M. T. Gokmen, S. Rinnen, H. F. Arlinghaus, F. D. Prez, B. J. Ravoo, *J. Mater. Chem.* **2012**, *22*, 6190–6199.
- 7 G.-Y. Shi, L.-P. Yang, C.-Y. Pan, *Journal of Polymer Science: Part A: Polymer Chemistry.* **2008**, *46*, 6496–6508.
- 8 J.-L. Chen, M. Su, Z.-Q. Jiang, N. Liu, J. Yin, Y.-Y. Zhu, Z.-Q. Wu, *Polym. Chem.* **2015**, *6*, 4784–4793.
- 9 J. Huang, Y. Xu, H. Xiao, Z. Xiao, Y. Guo, D. Cheng, X. Shuai, *ACS Nano* **2019**, *13*, 7036–7049.
- 10 Q. Zhang, P. Wilson, Z. Li, R. McHale, J. Godfrey, A. Anastasaki, C. Waldron, D. M. Haddleton, *J. Am. Chem. Soc.* **2013**, *135*, 7355–7363.
